# Supplementary material
Source: Springer Nature journal article supplement (https://www.springermedizin.de/resource/supplementary/12985_2010_1285_MOESM3_ESM.pdf/9609496)

**(A)**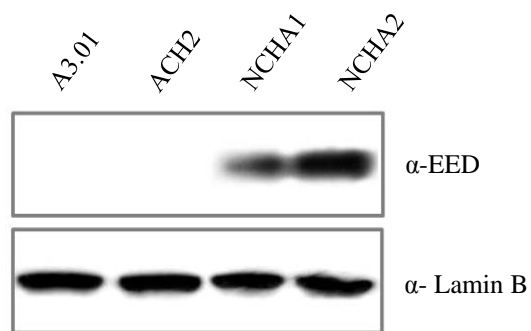**(B)**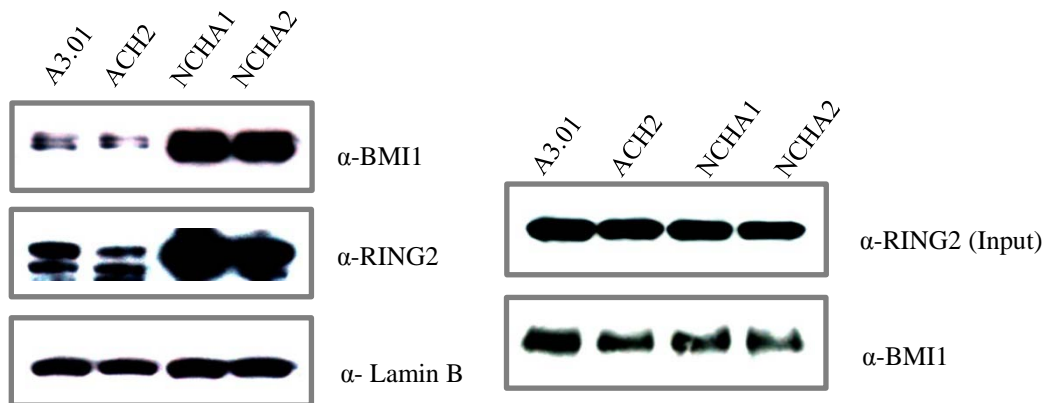**(C)**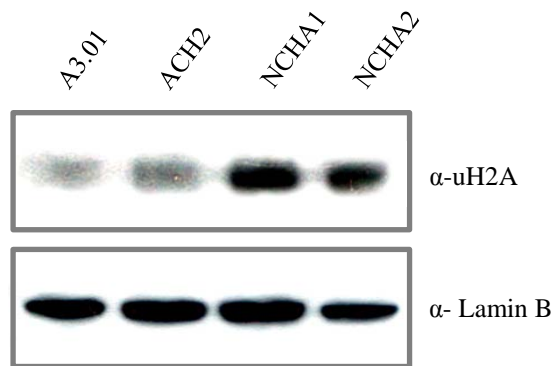

Supplement: MOESM3 [file 9609496]
